# Supplementary material for: Hsa_circ_0048179 attenuates free fatty acid-induced steatosis via hsa_circ_0048179/miR-188-3p/GPX4 signaling
Source: Aging (Albany NY). 2020 Nov 18;12(23):23996–4008. doi: 10.18632/aging.104081 (PMC7762518; doi:10.18632/aging.104081)
Supplement: Supplementary Figure 1 [file aging-12-104081-s001.pdf]

## SUPPLEMENTARY FIGURE

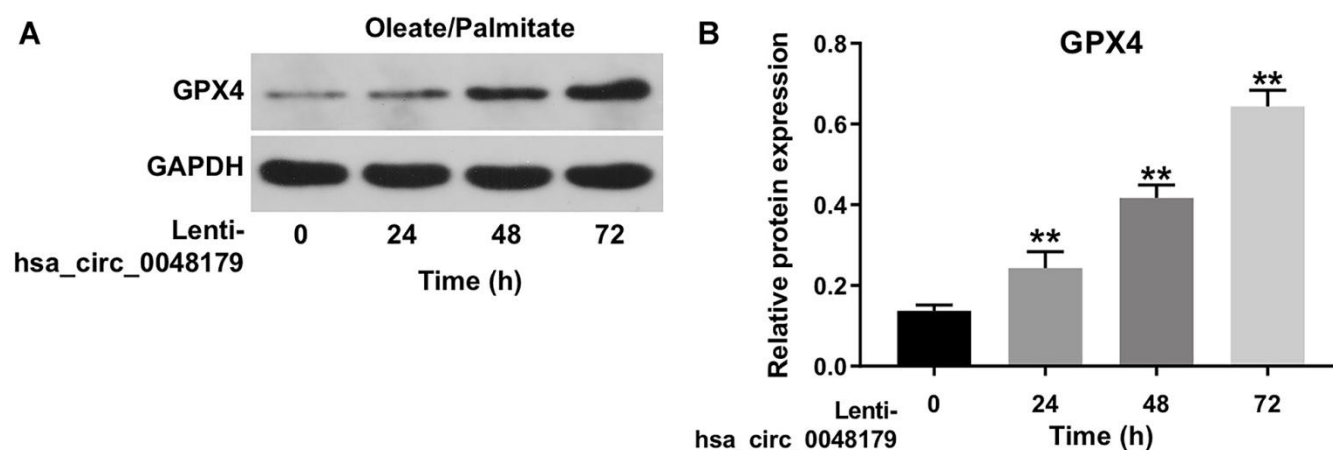

**Supplementary Figure 1. Overexpression of hsa\_circ\_0048179 upregulated the expression of GPX4 in HepG2 cells.** (A) HepG2 cells were transfected with hsa\_circ\_0048179 for 0, 24, 48 and 72 h, and then exposed to oleate/palmitate (2:1 molar ratio) for another 24 h. Levels of GPX4 expression in HepG2 cells were detected with western blotting. (B) Relative expression of GPX4 in HepG2 cells was quantified by normalization to GAPDH. \*\*P<0.01 vs. control group.
